# Supplementary material for: Novel KRAS Gene Mutations in Sporadic Colorectal Cancer
Source: PLoS One. 2014 Nov 20;9(11):e113350. doi: 10.1371/journal.pone.0113350 (PMC4239073; doi:10.1371/journal.pone.0113350)
Supplement: Table S2 — Mutations in KRAS gene (exons 2, 3, & 4) and EGFR gene (delections in exon 19, insertions in exon 20, point mutations in exons 18, 20, & 21). (XLS) [file pone.0113350.s003.xls]

## Sheet: Data Not Shown
Table S2. Mutations in KRAS gene (exons 2, 3, & 4) and EGFR gene (delections in exon 19, insertions in exon 20, point mutations in exons 18, 20, & 21)
Sample Code	Sample MRN	KRAS Mutations (Exon 2/Codon 12)	KRAS Mutations (Exon 2/Codon 13)	KRAS Mutations (Exon 3/Codon 61)	KRAS Mutations (Exon 4)	EGFR Point Mutations	EGFR InDel Mutations
1	S07-1903(C)	none	none	none	none	none	none
2	S04-2925(B5)	GGT > TGT	none	none	none	none	none
3	S04-752(A4)	none	none	none	GCA > ACA (p.A146T, c.436G>A) previuosly reportded	none	none
4	S04-179(B3)	GGT > GCT	none	none	none	none	none
6	S08-2005(B3)	none	none	none	none	none	none
7	S09-2242(A3)	none	none	none	none	none	none
8	S09-303(D1)	none	none	none	none	none	none
9	S11-2139(A4)	GGT > GTT	none	none	none	none	none
12	S02-1231(A4)	GGT > AGT	none	none	none	none	none
13	S98-1877(A5)	none	none	none	none	none	none
14	S05-1627(A5)	none	GGC > GAC	none	none	none	none
16	S04-3055(A3)	none	none	none	none	none	none
17	S04-2137	none	none	none	none	none	none
18	S05-1767(A3)	none	none	none	none	none	none
19	S11-1976/4	none	none	none	none	none	none
20	S05-607(B3)	none	none	none	none	none	none
21	S04-2951(C)	GGT > TGT	none	none	none	none	none
22	S09-487(A)	none	none	none	none	none	none
23	S08-3113(C4)	none	none	none	none	none	none
24	S09-1317(A3)	GGT > GAT	none	none	none	none	none
25	S11-2633(A8)	none	none	none	none	none	none
26	S04-179(B3)	none	none	none	none	none	none
27	S04-2044(A4)	GGT > GTT	none	none	none	none	none
28	S11-599(B4)	none	none	none	none	none	none
29	S04-2925(B5)	none	none	none	none	none	none
30	S08-2871(A31)	GGT > GAT	none	none	none	none	none
31	S08-2890(A3)	none	none	none	none	none	none
32	S05-2572(B5)	GGT > GAT	none	none	GCA > GTA (p.A134V, c.401C>T) novel	none	none
33	S99-260(C1)	none	none	none	AGA > AAA(p.R135K, c.404G>A) novel	none	none
34	S02-1907(A1)	none	none	none	none	none	none
35	S08-111(B7)	none	none	none	none	none	none
36	S03-999(A1)	none	none	none	none	none	none
37	S02-1927(D3)	none	none	none	none	none	none
38	S02-1063(D3)	none	none	none	none	none	none
39	S00-2751(A5)	none	GGC > GAC	none	none	none	none
40	S02-2730(B3)	none	none	none	none	none	none
41	S99-2577(A2)	none	none	none	CAG > TAG (p.Q150stop, c.448C>T) novel	none	none
42	S99-1249	none	none	none	none	none	none
43	S03-3325	none	none	none	none	none	none
44	S98-3279	none	none	none	AAG > AAA (p.K147K, c.441G>A) novel	none	none
45	S02-3650(B)	GGT > GAT	none	none	CAG > TAG (p.Q150stop, c.448C>T) novel	none	none
46	S01-397(A)	none	none	none	none	none	none
47	S02-2622(A2)	none	GGC > GAC	none	none	none	none
48	S02-780(B1)	none	none	none	GAA > AAA (p.E143K, c.427G>A) novel	none	none
49	S06-1514(D2)	none	none	none	none	none	none
50	S01-2003(C1)	none	none	none	GGA >GGG (p.G138G, c.414A>G) novel	none	none
51	S02-2717(B5)	none	none	none	AGA > GGA(p.R149G, c.444A>G) novel	none	none
52	S02-2641	none	none	none	none	none	none
53	S00-2675	none	none	failed	GGA >GGG (p.G138G, c.414A>G) novel	none	none
54	S00-3315(E)	none	none	none	none	none	none
55	S00-2849(A2)	none	none	none	none	none	none
56	S02-3721	none	none	none	none	none	none
57	S99-1525	none	none	none	none	none	none
58	S02-1224	none	none	none	none	none	failed
59	S12-92(A5)	none	none	none	none	none	none
61	S07-2242(B3)	none	none	none	GGA >GGG (p.G138G, c.414A>G) novel	none	none
